# Supplementary material for: Study of benzophenone grafting on reduced graphene oxide by unconventional techniques
Source: Royal Society of Chemistry journal article supplement (doi:10.1039/c4nj02229g), 2015-01-01
Supplement: c4nj02229g1.pdf [file c4nj02229g1.pdf]

**Electronic Supporting Information (ESI) for New Journal of Chemistry**

**Study of benzophenone grafting on reduced graphene oxide by  
unconventional techniques**

Ignazio Roppolo<sup>a\*</sup>, Annalisa Chiappone<sup>a</sup>, Samuele Porro<sup>a</sup>, Micaela Castellino<sup>a</sup>, Enzo Laurenti<sup>b</sup>

<sup>a</sup>*Istituto Italiano di Tecnologia, Center for Space Human Robotics, C.so Trento 21, 10129 Torino, Italy*

<sup>b</sup>*Dipartimento di Chimica, Università di Torino, Via P. Giuria 7, 10125, Torino, Italy*

**Supporting Information**

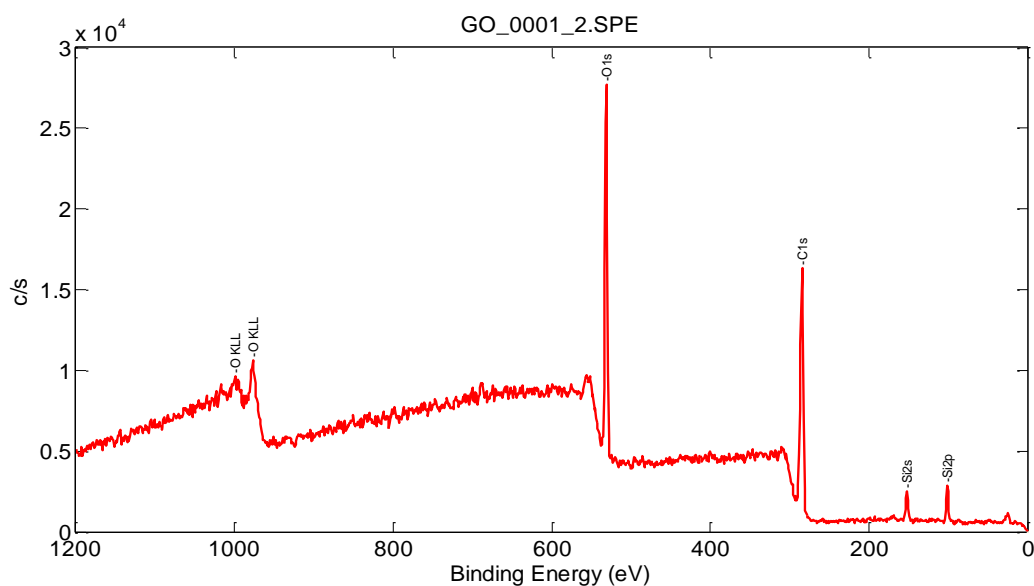

Figure S1 XPS survey spectra of pristine graphene oxide.

\* Corresponding Author.

Tel. :+390110903421

Email address: ignazio.roppolo@iit.it

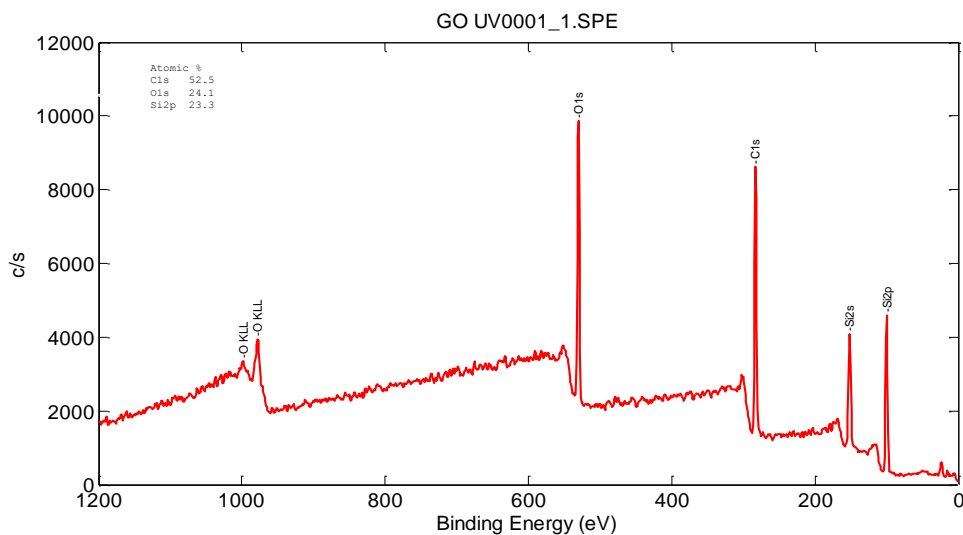

Figure S2 XPS survey spectra of pristine graphene oxide after 5 minutes of UV irradiation.

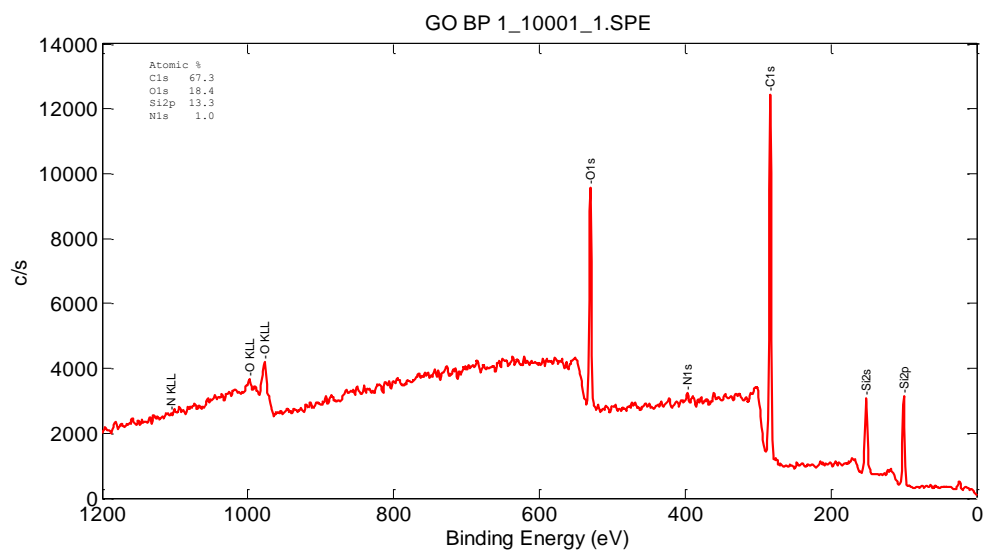

Figure S3 XPS survey spectra of pristine graphene oxide after 5 minutes of UV irradiation in the presence of benzophenone (1:1 wt/wt).

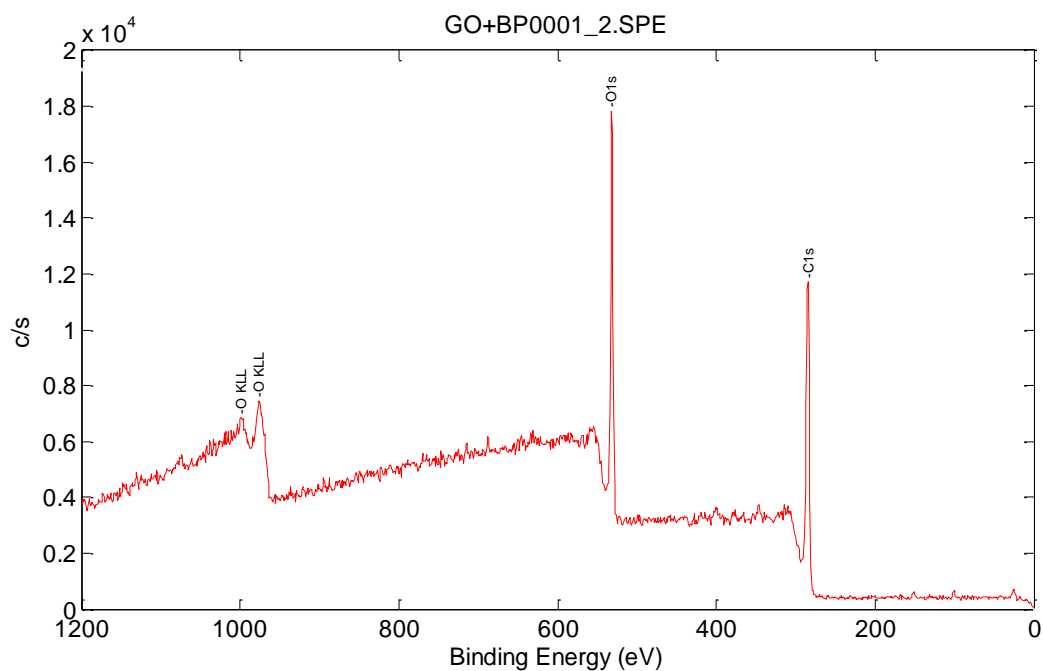

Figure S4 XPS survey spectra of pristine graphene oxide after 5 minutes of UV irradiation in the presence of benzophenone (1:3 wt/wt).

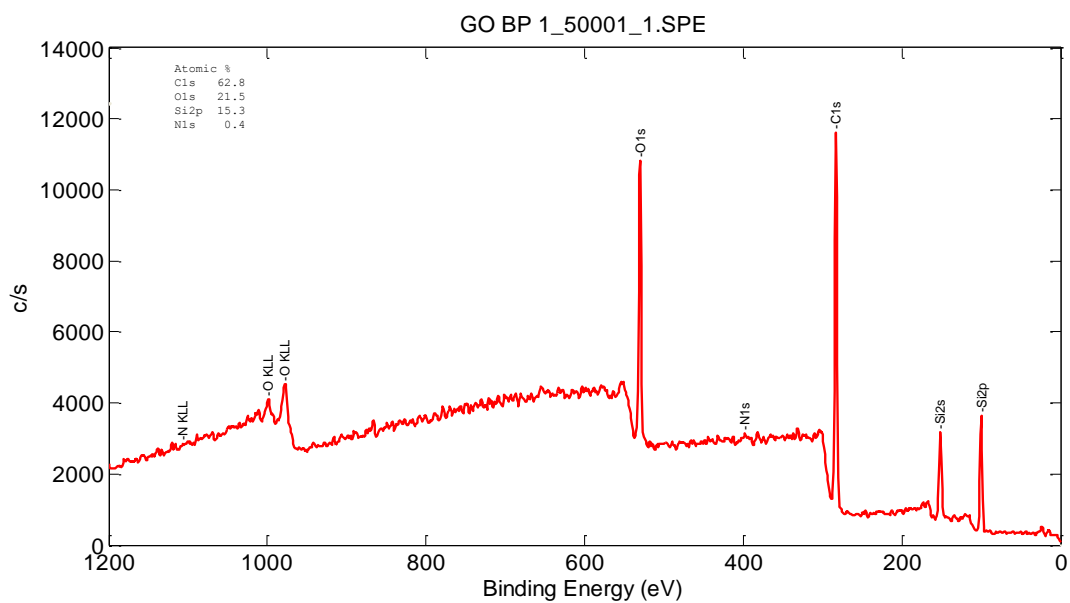

Figure S5 XPS survey spectra of pristine graphene oxide after 5 minutes of UV irradiation in the presence of benzophenone (1:5 wt/wt).

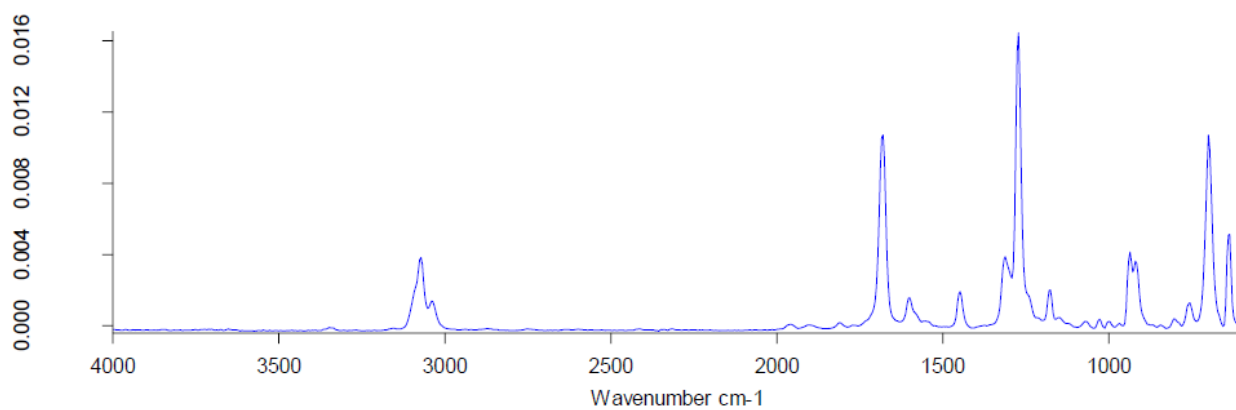

Figure S6 IR spectrum of Benzophenone at the degradation temperature

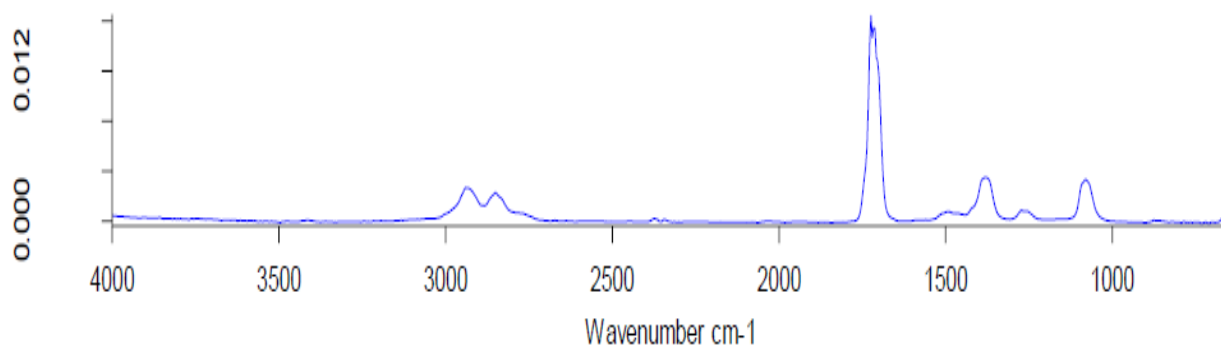

Figure S7 IR spectrum of DMF

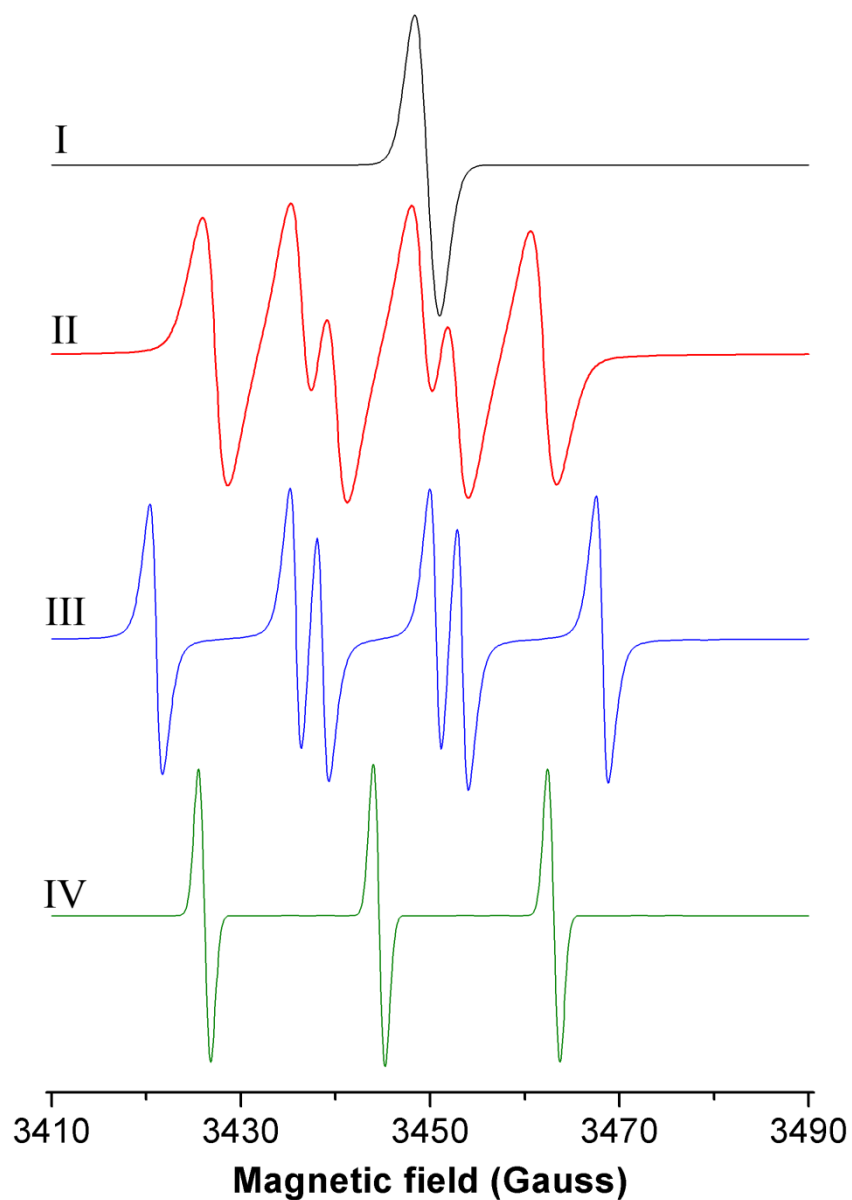

Figure S8. ESR simulation of the different radical species measured. I, a single isotropic signal, observed also in absence of DMPO; II, the DMPO-DMF species; III, the DMPO-BP radical adduct; IV, a three-lines pattern of a nitroxide-like radical, probably due to a degradation of DMPO as a results of irradiation. For a better comprehension, the relative abundance of each species was not taken in account into the representation.

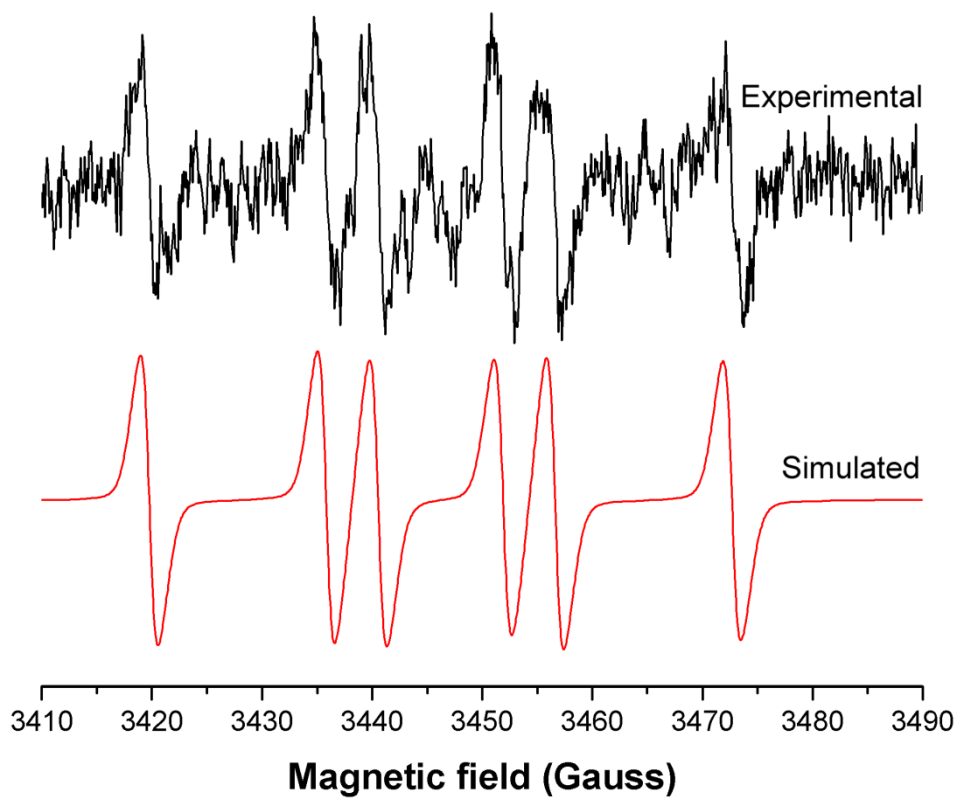

Figure S9. ESR spectra of DMPO-BP in water. The experimental spectrum was obtained from the GO/UV spectrum shown in Figure 5 by subtraction of the simulated spectra of the species I, II and IV.
